# Supplementary material for: The mosaic architecture of Aeromonas salmonicida subsp. salmonicida pAsa4 plasmid and its consequences on antibiotic resistance
Source: PubMed Central journal article supplement (PMC5088629; doi:10.7717/peerj.2595), 2016-10-27

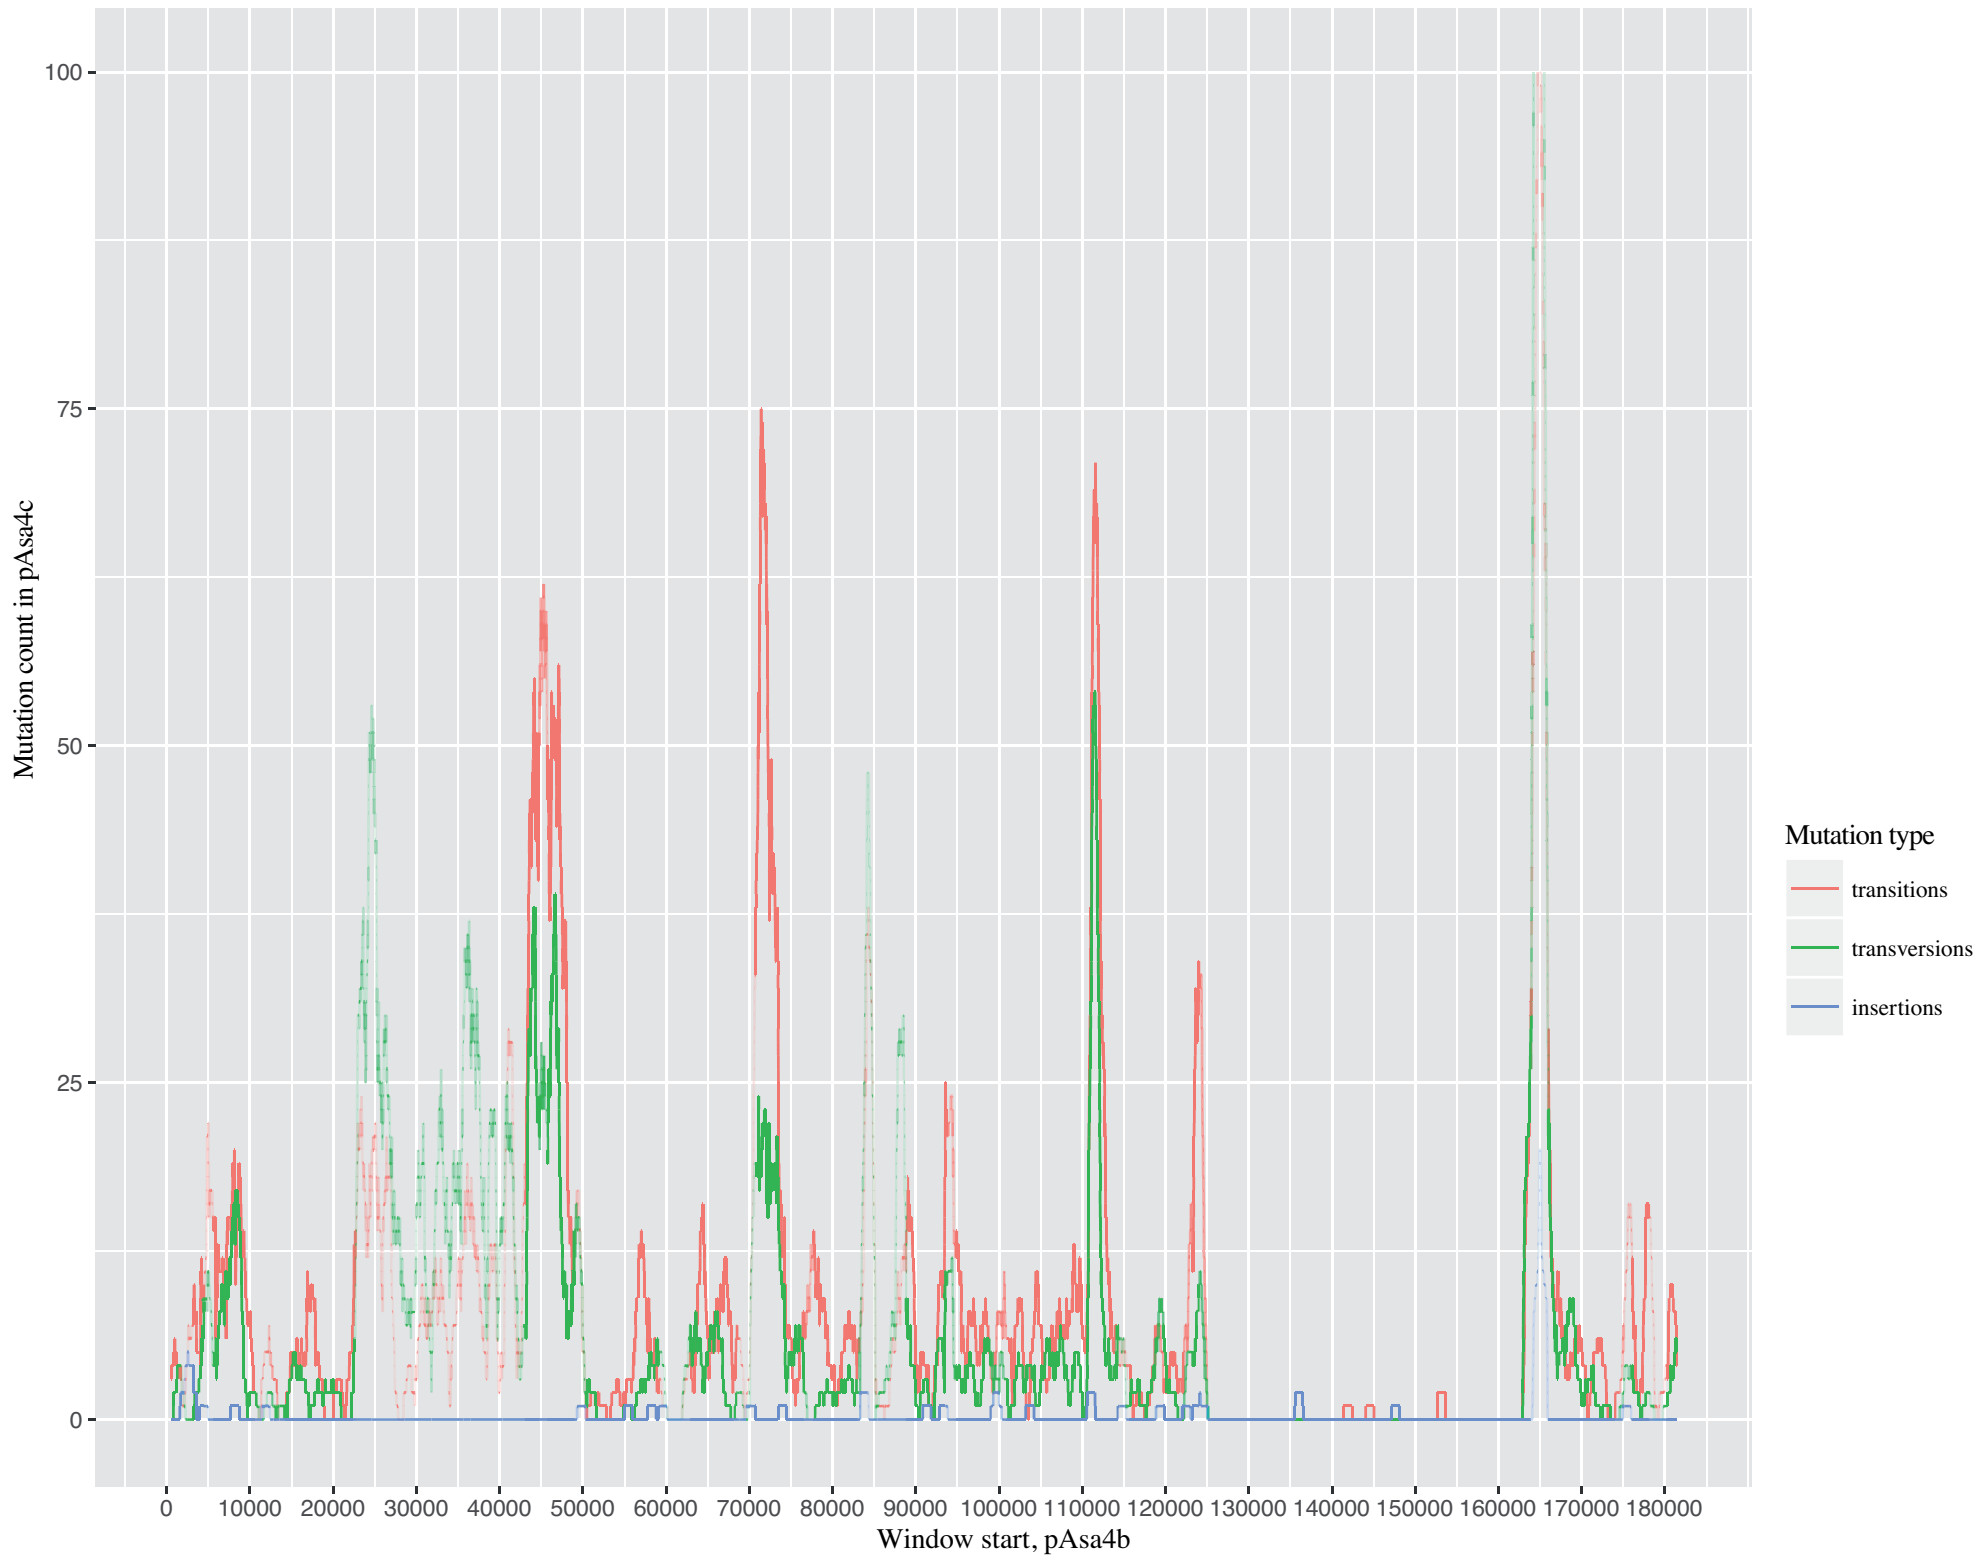

Supplement: peerj-04-2595-s001.pdf [file peerj-04-2595-s001.pdf]
